# Supplementary figures and images for: Somatostatin receptor 5 and cannabinoid receptor 1 activation inhibit secretion of glucose-dependent insulinotropic polypeptide from intestinal K cells in rodents
Source: Springer Nature journal article supplement (doi:10.1007/s00125-012-2663-5), 2012-08-07

supplementary figure 1

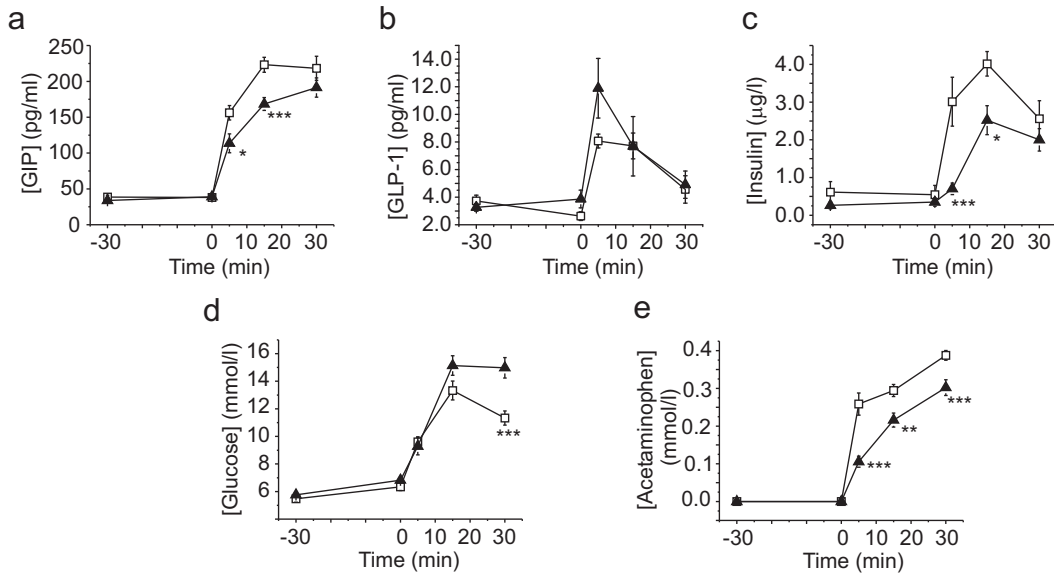

Supplement: MOESM1 [file 8091058]
